# Supplementary material
Source: Springer Nature journal article supplement (https://www.springermedizin.de/resource/supplementary/13023_2013_624_MOESM3_ESM.pdf/9642516)

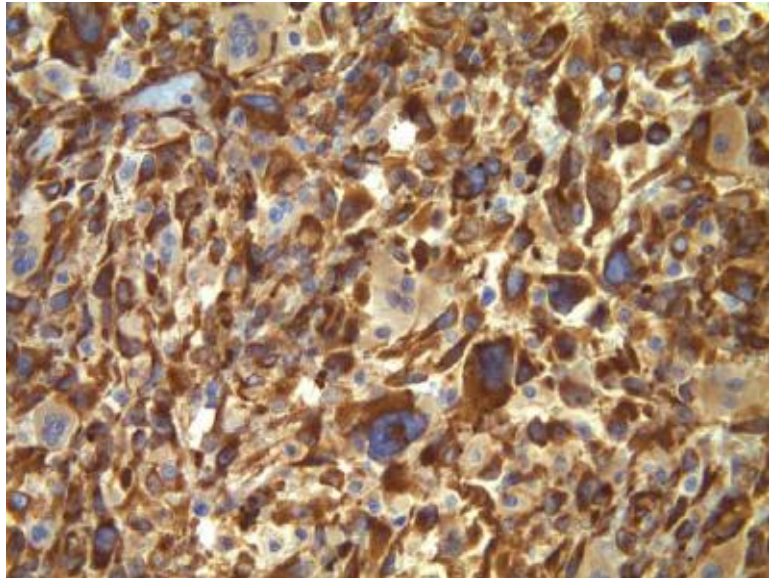

**SPARC**

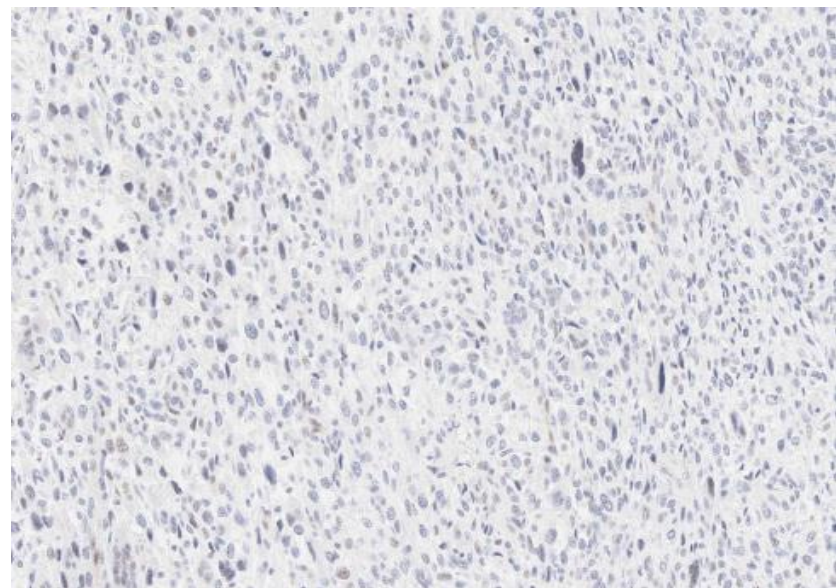

**p-AKT**

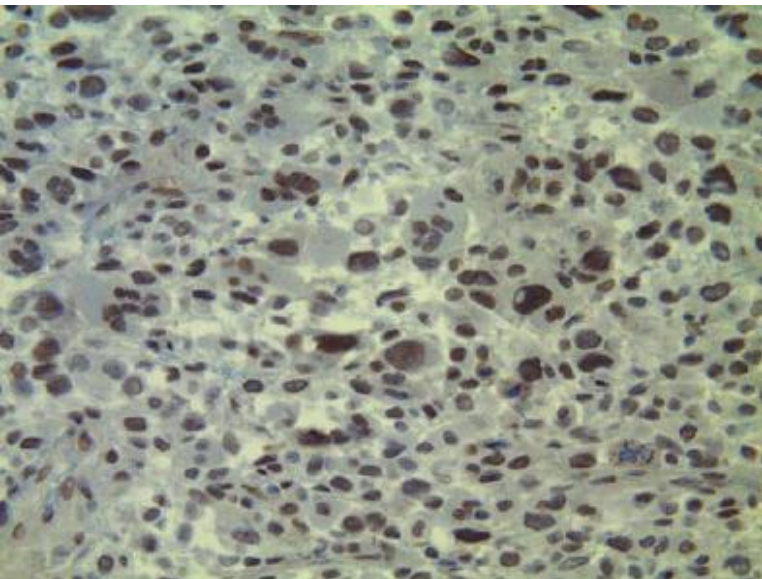

**p-mTOR**

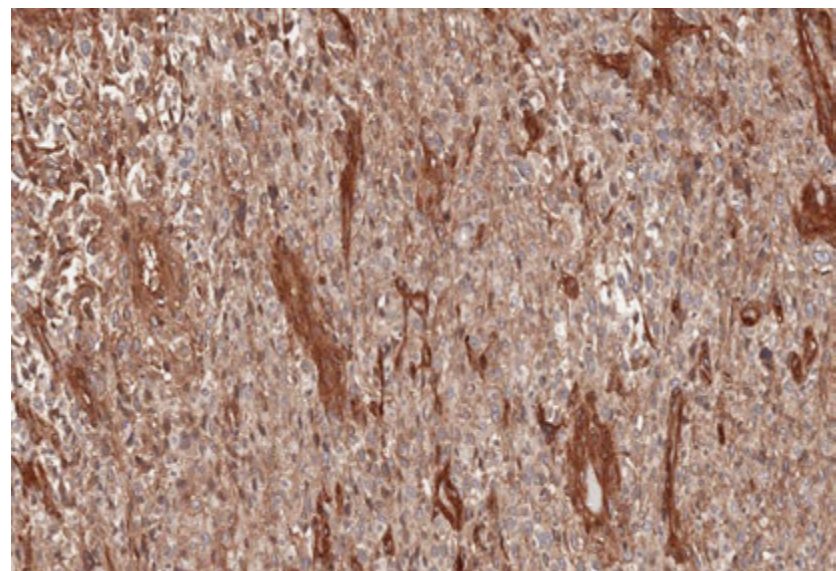

**PDGFR-β**

Supplement: MOESM3 [file 9642516]
